# Supplementary figures and images for: Clinical and radiobiological evaluation of a method for planning target volume generation dependent on organ-at-risk exclusions in magnetic resonance imaging-based prostate radiotherapy
Source: PubMed Central journal article supplement — Phys Imaging Radiat Oncol. 2018 Dec 7;8:51–6. doi: 10.1016/j.phro.2018.11.007 (PMC7807578; doi:10.1016/j.phro.2018.11.007), 2018-12-07

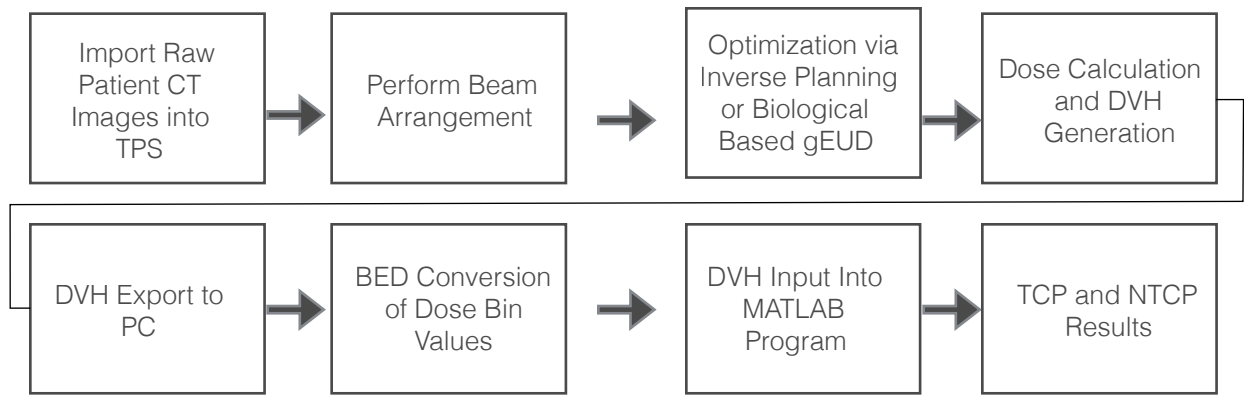

Supplement: mmc1.pdf [file mmc1.pdf]
